# Supplementary material for: Shear-thinning hyaluronan-based fluid hydrogels to modulate viscoelastic properties of osteoarthritis synovial fluids
Source: Royal Society of Chemistry journal article supplement (doi:10.1039/c9bm00298g), 2019-01-01
Supplement: c9bm00298g1.pdf [file c9bm00298g1.pdf]

## Supporting Information

### **Shear-thinning hyaluronan-based fluid hydrogels to modulate viscoelastic properties of osteoarthritis synovial fluids**

Zhixiang Cai,<sup>†</sup> Hongbin Zhang,<sup>†\*</sup> Yue Wei,<sup>†</sup> Min Wu,<sup>†</sup> Ailing Fu<sup>‡</sup>

<sup>†</sup>Advanced Rheology Institute, Department of Polymer Science and Engineering, School of Chemistry and Chemical Engineering, Shanghai Jiao Tong University, Shanghai 200240, China

<sup>‡</sup>Shanghai Jingfeng Pharmaceutical Co. Ltd., Shanghai 200120, China

E-mail: [hbzhang@sjtu.edu.cn](mailto:hbzhang@sjtu.edu.cn)

#### **Experimental section**

##### *FT-IR spectroscopy*

Fourier-transform infrared (FT-IR) spectra were recorded with a Perkin Elmer Spectrum 100 FT-IR spectrometer (Perkin Elmer, USA) in the range of 4000 to 400  $\text{cm}^{-1}$  using the KBr-disk method. HA, HA-VS, and freeze-dried HA-VS/SH-2-PEG gel were mixed with the KBr powder. The mixed powder were compressed into disks for measurements.

##### *NMR spectroscopy*

The  $^1\text{H}$ -NMR spectra of HA and HA-VS were recorded on an AVANCE III 400 spectrometer (Bruker, Switzerland) at room temperature in  $\text{D}_2\text{O}$ . The  $^1\text{H}$  chemical shifts were referred to the solvent peak ( $\delta = 4.8$  ppm for HOD) used as an internal standard. The DS of HA-VS was also determined using  $^1\text{H}$ -NMR spectroscopy. The  $^1\text{H}$ -NMR spectra of HA hydrogel were recorded on the same instrument using tetramethylsilane (TMS) as internal reference and ( $\text{D}_2\text{O}/\text{D}_2\text{SO}_4 = 3:1$ ) as solvent. Briefly, the freeze-dried HA-VS/SH-2-PEG gel was introduced into  $\text{D}_2\text{O}/\text{D}_2\text{SO}_4 (3:1)$  and then heated at  $80^\circ\text{C}$  for about 10 min. A portion of this solution was filtered directly into an NMR tube for measurement. All data processing was carried out with MestReNova software.

##### *Swelling equilibrium of hydrogels*

The as-obtained freeze-dried samples were immersed in PBS buffer (10 mM, pH=7.4) at 37°C in sealed vials. The hydrogel samples were taken periodically from the solution, and hydrogel weight was measured after removal of excess surface water with filter paper; the hydrogel samples were then returned to the vial until they had insufficient physical integrity to handle. The experiment was performed in triplicate. The swelling ratio of  $S_w$  can be calculated by measuring hydrogel weight in the swollen state and its corresponding dry weight (after lyophilization) by the following equation:

$$\text{Swelling ratio } (S_w) = (W_s - W_d)/W_d \times 100\%, \quad (1)$$

where  $W_s$  and  $W_d$  are the swollen weight and dry weight, respectively.

#### *Surface morphology*

The surface morphology and structure of freeze-dried HA-VS/SH-2-PEG samples were obtained by Nova NanoSEM 450 scanning electron microscopy (FEI, Netherlands). The sample was cross-sectioned and mounted on aluminum stubs with carbon tape, and then observed at 20 kV of electron acceleration under a low vacuum.

#### *Injectability*

The viscosupplement (HV-3) and hydrogel were loaded into syringes (1 mL), respectively, for injection tests. The injection forces of the HV-3 viscosupplement and the hydrogel were measured by unconfined, uniaxial compression tests using a TA-XT plus Texture Analyzer in compression mode (Stable Micro System Co., Britain). The maximum force during the testing was used as the injection force.

#### *Optical microscopy of viscosupplements*

Optical microscopy observations were made with a Leica DMLP polarizing optical microscope (Leica Microsystems, Germany). The samples were sandwiched between precleaned glasses during observation.

#### *Degradation of viscosupplements*

The degradation kinetics of the viscosupplements in the presence or absence of hyaluronidase (100 U/mL) were evaluated by comparing the evolution of the storage modulus ( $G'$ ) as a function of time at 37°C on AR-G2. Briefly, at specified time intervals, the viscosupplements loaded on the geometry through a syringe needle were analyzed for  $G'$  of each sample. The measurements were stopped when complete degradation occurred or the study terminated.

*In vitro drug release from viscosupplements*

TA is employed as a glucocorticoid to inhibit joint inflammation and pain in patients with osteoarthritis. TA-loaded HA-VS/SH-2-PEG hydrogel was prepared following the same procedures as described in “Formation of HA-Based Hydrogel (HA-VS/SH-2-PEG)”. In brief, the HA-VS derivative was dissolved in TA acetate injection (2.5 mL at 10 mg/mL) to obtain an 8 mg/mL HA-VS solution, and the solution was neutralized to pH=7.4 by addition of NaOH solution (1 M). TA-loaded hydrogel was initiated by adding the SH-2-PEG compound to the hydrogel precursor solution (HA-VS solution). The TA-loaded hydrogel was broken up and passed through a sieve (1 mm) covered with a nylon cloth of 200 mesh. The microgels containing TA were then immersed in 0.8% HA solution at 37°C with continuous agitation (50 rpm) in the absence or presence of hyaluronidase (100 U/mL). At desired intervals, 200  $\mu$ L of the solution was taken out to quantify the release and at the same time replaced with an equal volume of fresh HA solution. Subsequently, 200  $\mu$ L of the solution was diluted by methanol/water (1:1) to form 3 mL of solution. The percentage of TA released was quantitatively analyzed using UV-vis spectroscopy and was calculated by interpolation from a standard calibration curve constructed from known concentrations of TA (methanol: water = 1:1). Three replicates were performed for each time point.

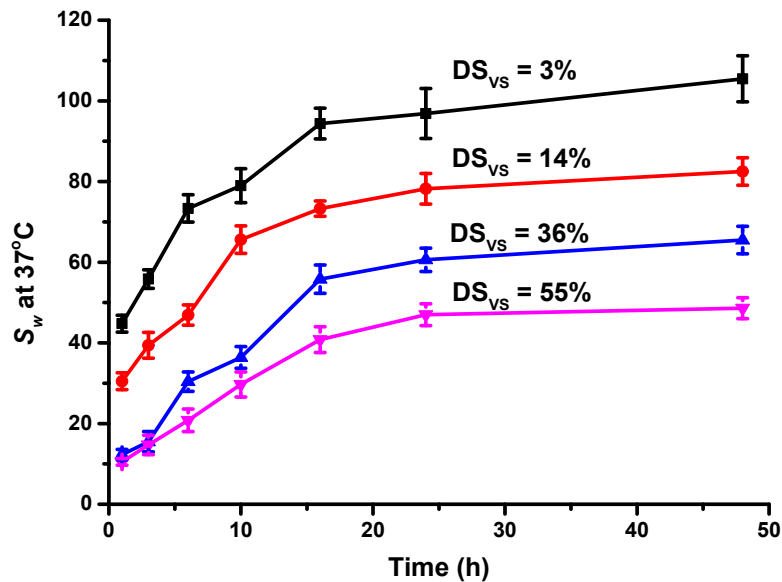

Figure S1 Swelling equilibrium experiments of hydrogels in PBS as a function of  $DS_{vs}$ .

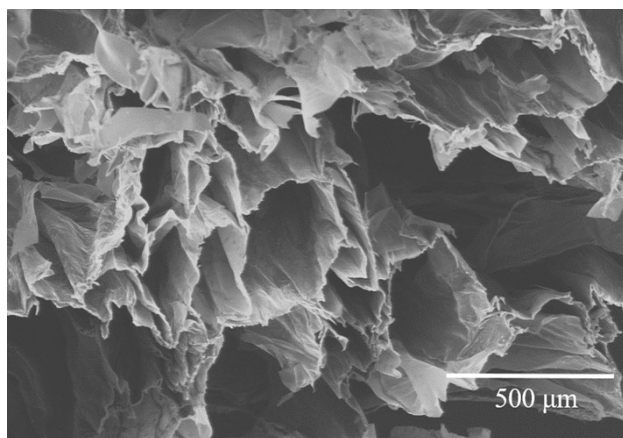

Figure S2. Typical SEM photographs (surface morphologies and cross-sectional morphologies) of freeze-dried HA-VS/SH-2-PEG hydrogel ( $DS_{VS} = 3\%$ ;  $M_w$  (SH-2-PEG) = 3400).

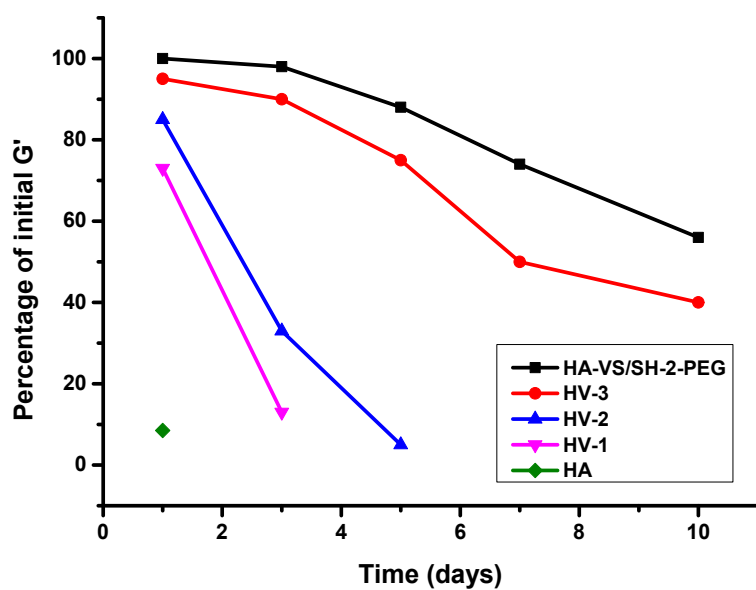

Figure S3 Degradation time dependence of  $G'$  of HA, viscosupplements, and hydrogel at 37 °C

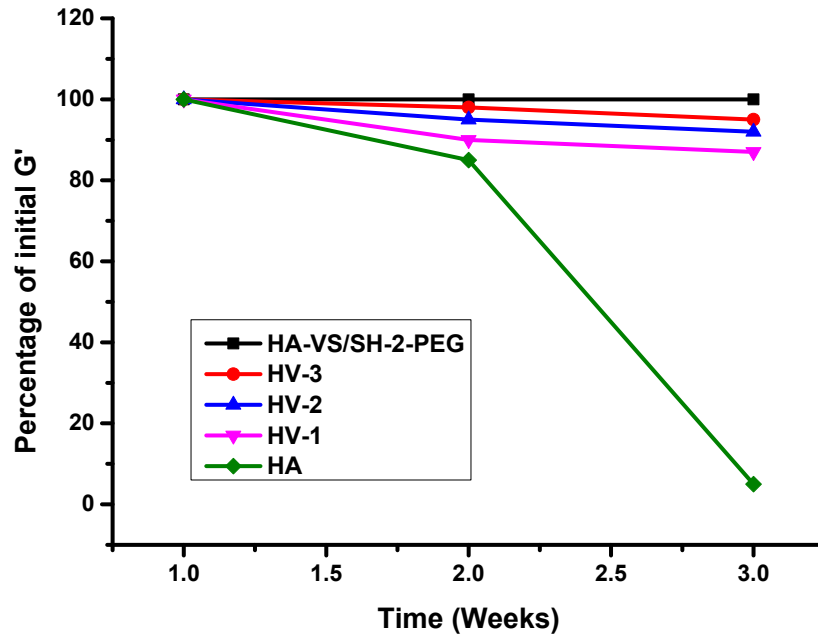

Figure S4 Degradation time dependence of  $G'$  of HA, viscosupplements, and hydrogel at 37 °C in the presence of hyaluronidase.

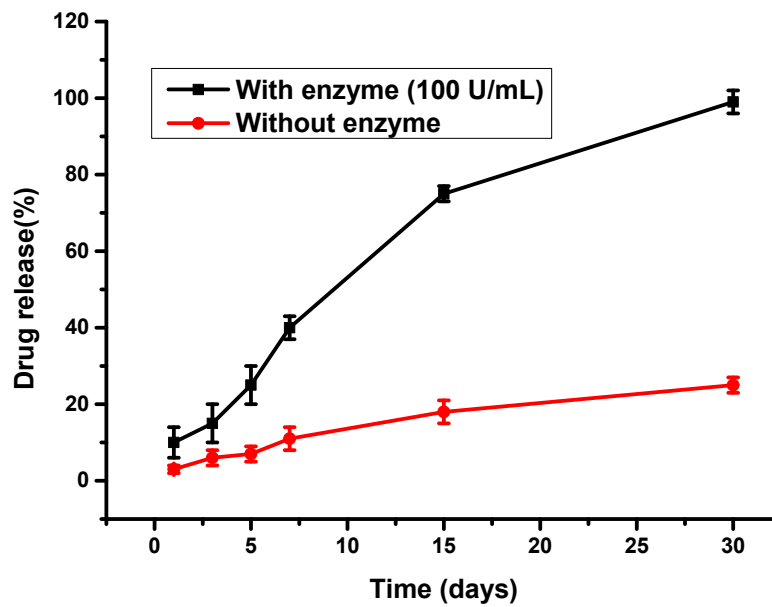

Figure S5 *In vitro* release test of TA from microgels (HV-1) in the absence or presence of hyaluronidase.
